# Supplementary material for: Exploring dual-emission properties in Mn4+ distinctively activated BaTaF7 red emitting phosphor
Source: Royal Society of Chemistry journal article supplement (doi:10.1039/d3tc01294h), 2023-01-01
Supplement: d3tc01294h1.pdf [file d3tc01294h1.pdf]

## Electronic Supplementary Information

### Exploring Dual-Emission Properties in Mn<sup>4+</sup> Distinctively Activated BaTaF<sub>7</sub> Red Emitting Phosphor

Konglan Chen <sup>a</sup>, Shiyu Jia <sup>a</sup>, Zifan Shao <sup>a</sup>, Xinxin Han <sup>b</sup>, Jian Yuan<sup>a</sup>, Yayun Zhou <sup>a\*</sup>,  
Tingting Deng <sup>a\*</sup>

<sup>a</sup> Guangdong-Hong Kong-Macao Joint Laboratory for Intelligent Micro-Nano Optoelectronic Technology, School of Physics and Optoelectronic Engineering, Foshan University, Foshan 528225, China

<sup>b</sup> School of Physical Science and Technology, MOE Key Laboratory of New Processing Technology for Non-ferrous Metals and Materials, Guangxi Key Laboratory of Processing for Non-ferrous Metals and Featured Materials, School of Resources, Environments and Materials, Guangxi University, Nanning 530004, China.

Corresponding author:

E-mail: zhou-yayun@foxmail.com (Y.Y. Zhou), tingtingdeng0803@163.com (T. T. Deng);

## Figures

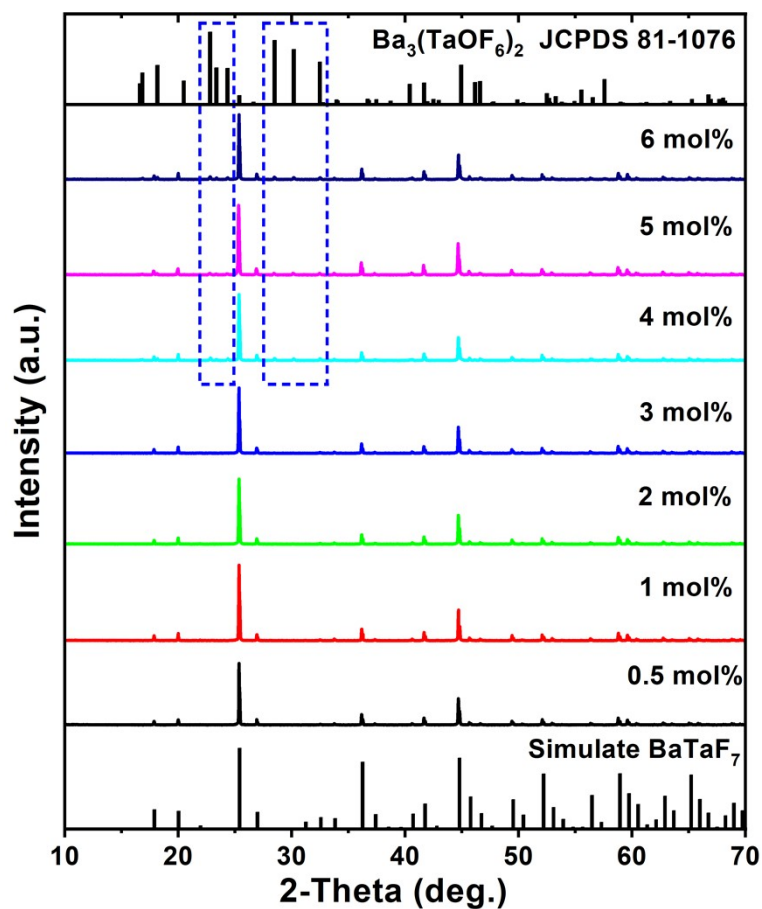

**Fig. S1.** X-ray diffraction patterns of BTF with different dopant concentrations from 0.5 mol% to 6 mol%.

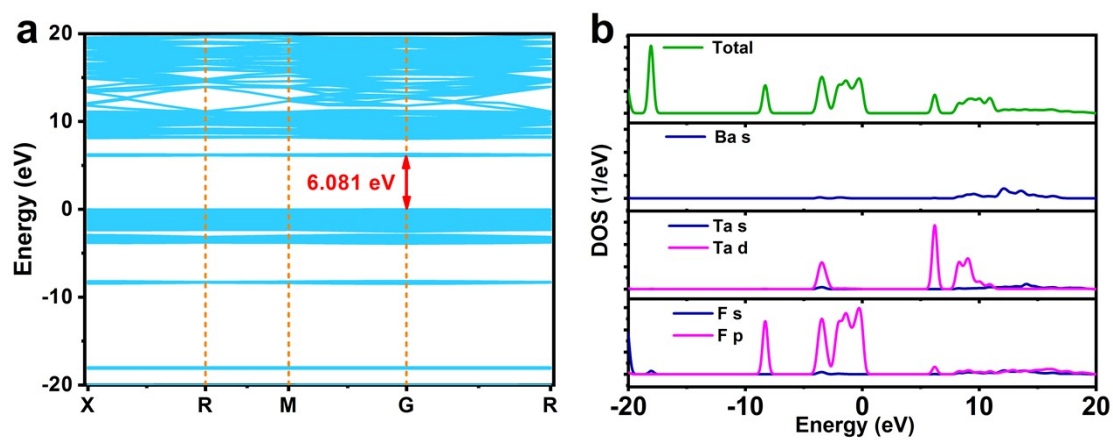

**Fig. S2.** The local symmetry of  $\text{Mn}^{4+}$  in  $\text{BaTaF}_7$  was obtained after the M3, M4 and M5 models were optimized.

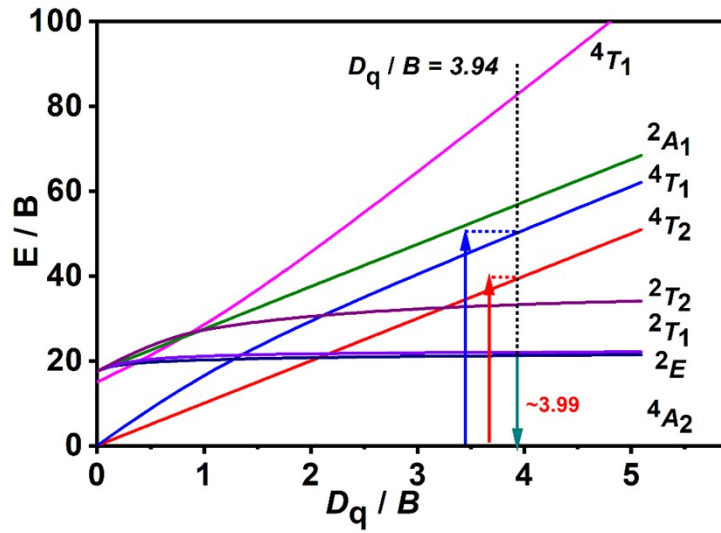

**Fig. S3.** Tanabe-Sugano energy-level diagram of  $\text{Mn}^{4+}$  ions in an octahedral crystal field;

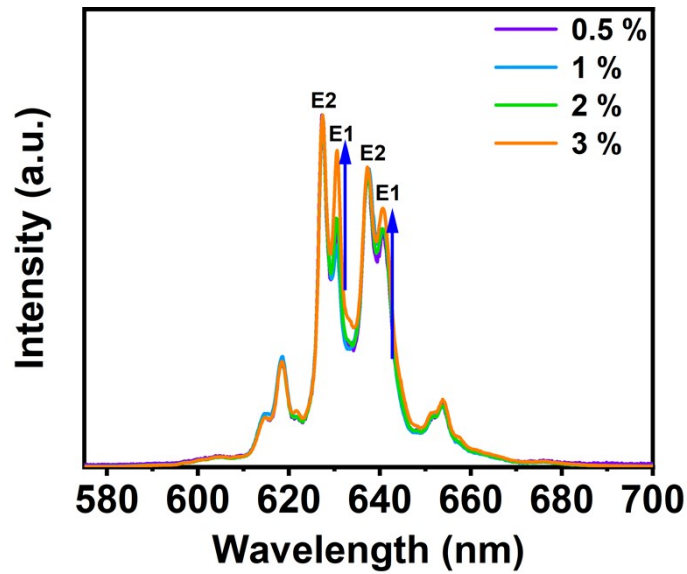

**Fig.S4.** Normalized PL spectra of BTF phosphors with different  $\text{Mn}^{4+}$  doping concentrations.

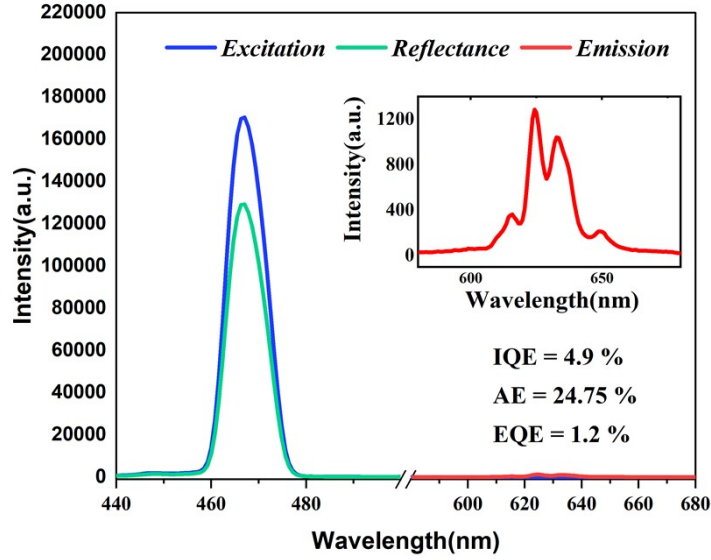

**Fig. S5.** PL spectra of BTF(3%) and the reference sample measured using an integrating sphere for IQE, AE and EQE.

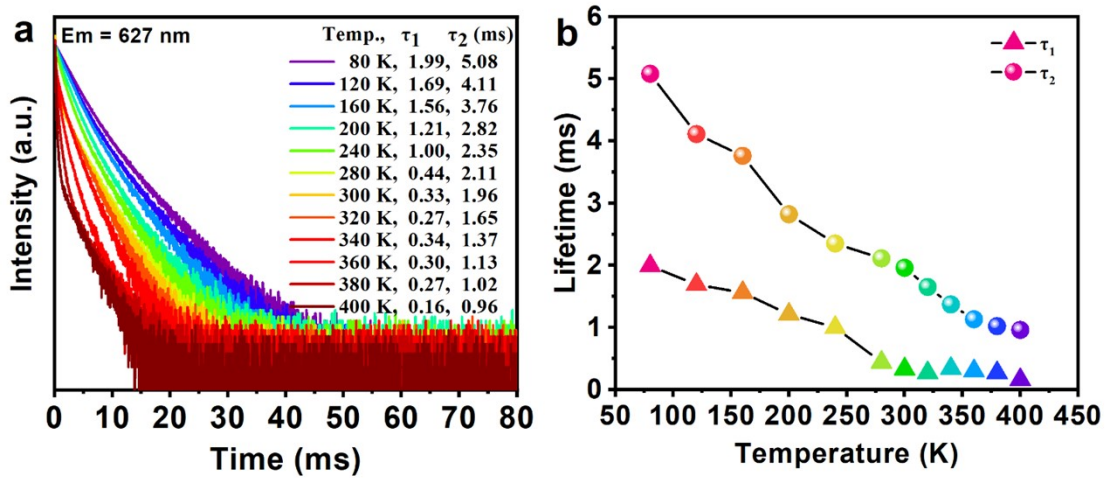

**Fig. S6.** Temperature-dependent decay curves and lifetime analysis of BaTaF<sub>7</sub>:3%Mn<sup>4+</sup>. (a) Decay curves at 627 nm with increasing temperature. (b) Bi-exponential fitting of the decay curves to extract the lifetimes  $\tau_1$  and  $\tau_2$  at 627 nm.

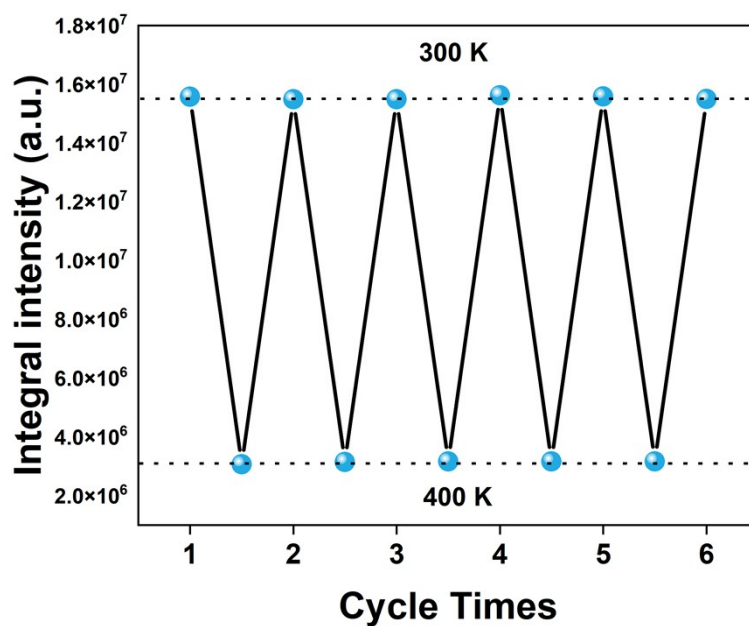

**Fig. S7** PL integrated intensity of BTf (3%) at 300 K and 400 K during heating-cooling cycles.

## Tables

**Table S1** Schemes of different ratios of  $K_2MnF_6$  to  $Ta_2O_5$  for the experimental of  $BaTaF_7:Mn^{4+}$  phosphor and actual doping amount of  $Mn^{4+}$  from ICP test results.

| Sample | Experimental ratio of $K_2MnF_6$ to $BaTaF_7$ (mol %) | Actual doping concentration of Mn to Ta (mol %) |
|--------|-------------------------------------------------------|-------------------------------------------------|
| 1      | 0.5                                                   | 0.19                                            |
| 2      | 1                                                     | 0.46                                            |
| 3      | 2                                                     | 0.86                                            |
| 4      | 3                                                     | 1.22                                            |
| 5      | 4                                                     | 1.51                                            |

**Table S2.** The Refined structure parameters of  $BaTaF_7:Mn^{4+}$  sample.

| Atom | X       | Y       | Z       | Occ.   | B     | Site |
|------|---------|---------|---------|--------|-------|------|
| Ta   | 0.22374 | 0.22374 | 0.22374 | 0.9975 | 0.200 | 8c   |
| Mn1  | 0.22374 | 0.22374 | 0.22374 | 0.0025 | 0.200 | 8c   |
| Ba 1 | 0.00000 | 0.00000 | 0.00000 | 0.9975 | 0.518 | 4a   |
| Mn2  | 0.00000 | 0.00000 | 0.00000 | 0.0025 | 0.518 | 4a   |

|      |         |         |         |       |       |     |
|------|---------|---------|---------|-------|-------|-----|
| Ba 2 | 0.50000 | 0.00000 | 0.00000 | 1.000 | 0.722 | 4b  |
| F 1  | 0.25800 | 0.05590 | 0.11680 | 1.000 | 0.200 | 24d |
| F 2  | 0.36420 | 0.27910 | 0.10250 | 1.000 | 0.200 | 24d |
| F 3  | 0.33590 | 0.33590 | 0.33590 | 1.000 | 1.650 | 8c  |

**Table S3.** Crystallographic data of BaTaF<sub>7</sub>:Mn<sup>4+</sup> (derived from the Rietveld structure analysis of XRD pattern)

| Formula                             | BaTaF <sub>7</sub> : Mn <sup>4+</sup> |
|-------------------------------------|---------------------------------------|
| Crystal system                      | Cubic                                 |
| Space group                         | Pa $\bar{3}$                          |
| a (Å)                               | 9.92864(6)                            |
| b (Å)                               | 9.92864(6)                            |
| c (Å)                               | 9.92864(6)                            |
| $\alpha$                            | 90.0000                               |
| $\beta$                             | 90.0000                               |
| $\gamma$                            | 90.0000                               |
| V <sub>cell</sub> (Å <sup>3</sup> ) | 978.744794(168)                       |
| Z                                   | 4                                     |
| R <sub>wp</sub>                     | 8.318 %                               |
| R <sub>p</sub>                      | 6.590%                                |
| Gof                                 | 1.845                                 |

**Table S4.** The calculated formation energy (Ef) for four possible charge compensation models of Mn<sup>4+</sup> in BaTaF<sub>7</sub>.

| Model | Compounds          | Replacement forms                                                            | Defects           | Formation energy (eV) |
|-------|--------------------|------------------------------------------------------------------------------|-------------------|-----------------------|
| M1    | BaTaF <sub>7</sub> | Mn <sup>4+</sup> → Ta <sup>5+</sup><br>Mn <sup>4+</sup> → Ba <sup>2+</sup>   | F <sub>i</sub>    | 7.05                  |
| M2    | BaTaF <sub>7</sub> | Mn <sup>4+</sup> → Ta <sup>5+</sup><br>Mn <sup>4+</sup> → Ba <sup>2+</sup>   | F <sub>i</sub>    | 9.47                  |
| M3    | BaTaF <sub>7</sub> | Mn <sup>4+</sup> → Ta <sup>5+</sup>                                          | V <sub>F-</sub>   | 11.93                 |
| M4    | BaTaF <sub>7</sub> | Mn <sup>4+</sup> → Ba <sup>2+</sup>                                          | V <sub>Ba2+</sub> | 21.02                 |
| M5    | BaTaF <sub>7</sub> | 2Mn <sup>4+</sup> → 2Ta <sup>5+</sup><br>Mn <sup>4+</sup> → Ba <sup>2+</sup> | /                 | 27.61                 |
